# Supplementary material
Source: PubMed Central journal article supplement (PMC4459936)

# Suppl. Figure 1

**A.**

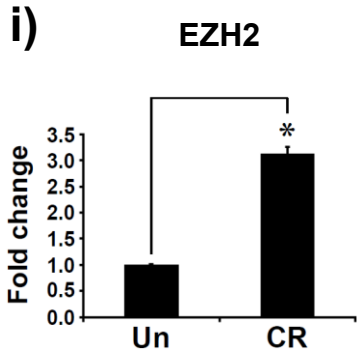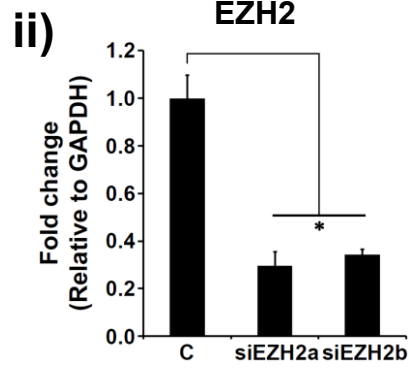

**B.**

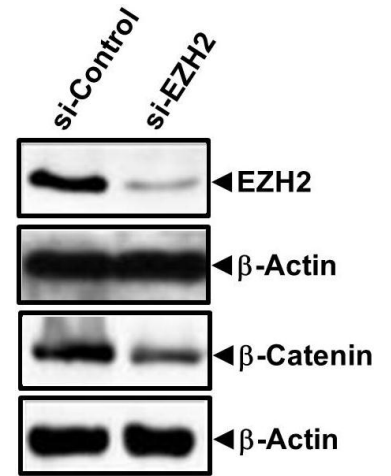

**C.**

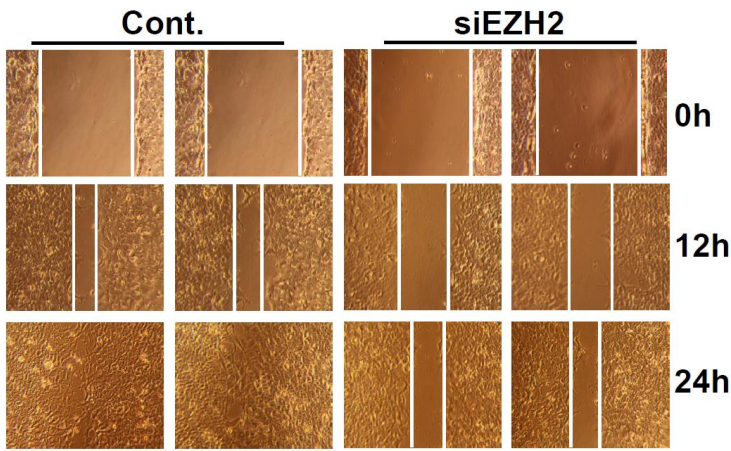

**D.**

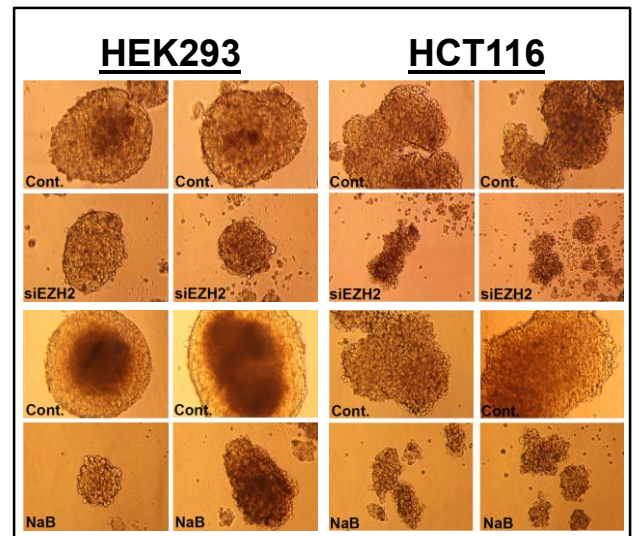

**E.**

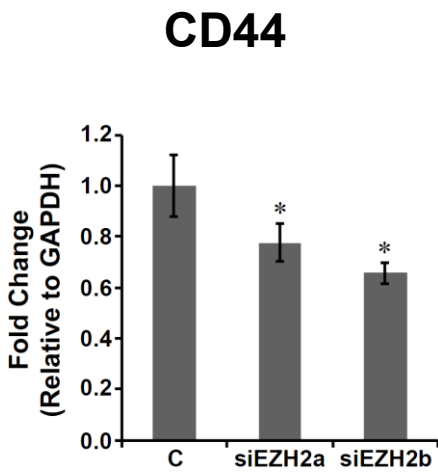

**F.**

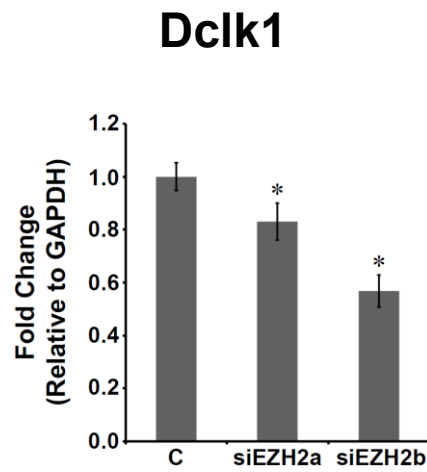

**G.**

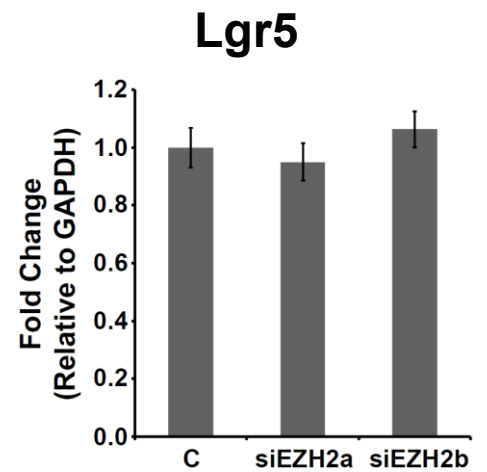

Supplement: NIHMS635673-supplement-1.pdf [file NIHMS635673-supplement-1.pdf]

# Suppl. Figure 2

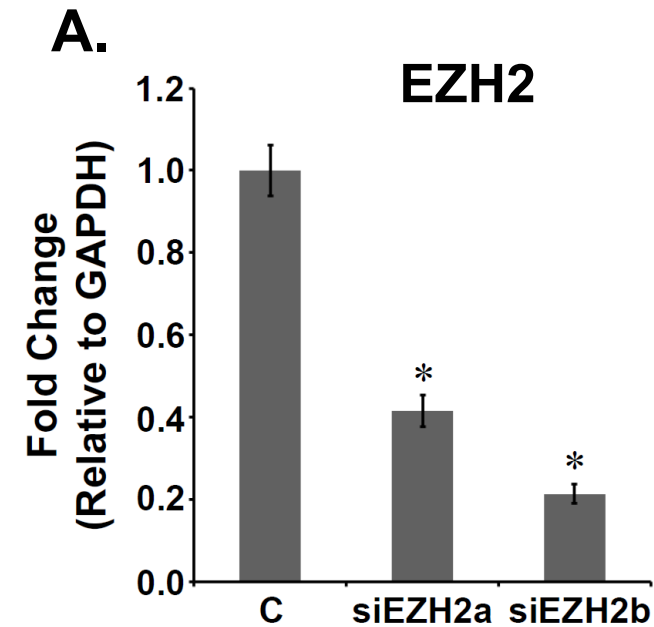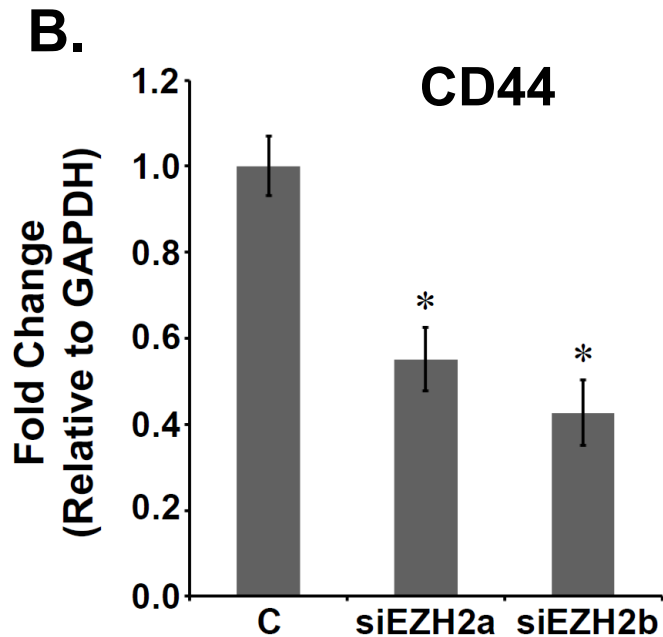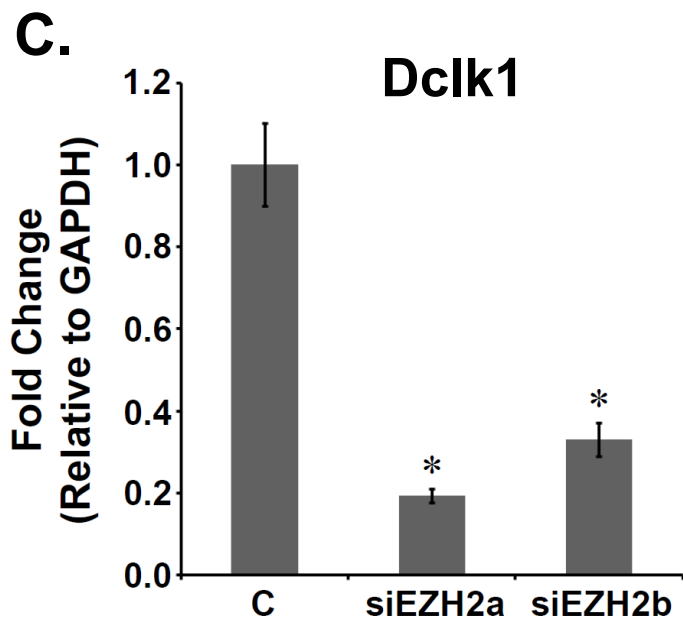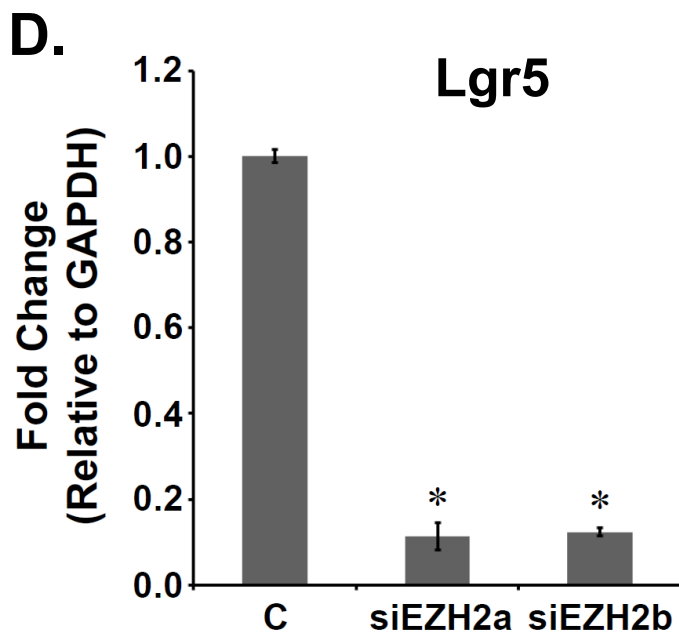

Supplement: NIHMS635673-supplement-2.pdf [file NIHMS635673-supplement-2.pdf]

# Suppl. Figure 3

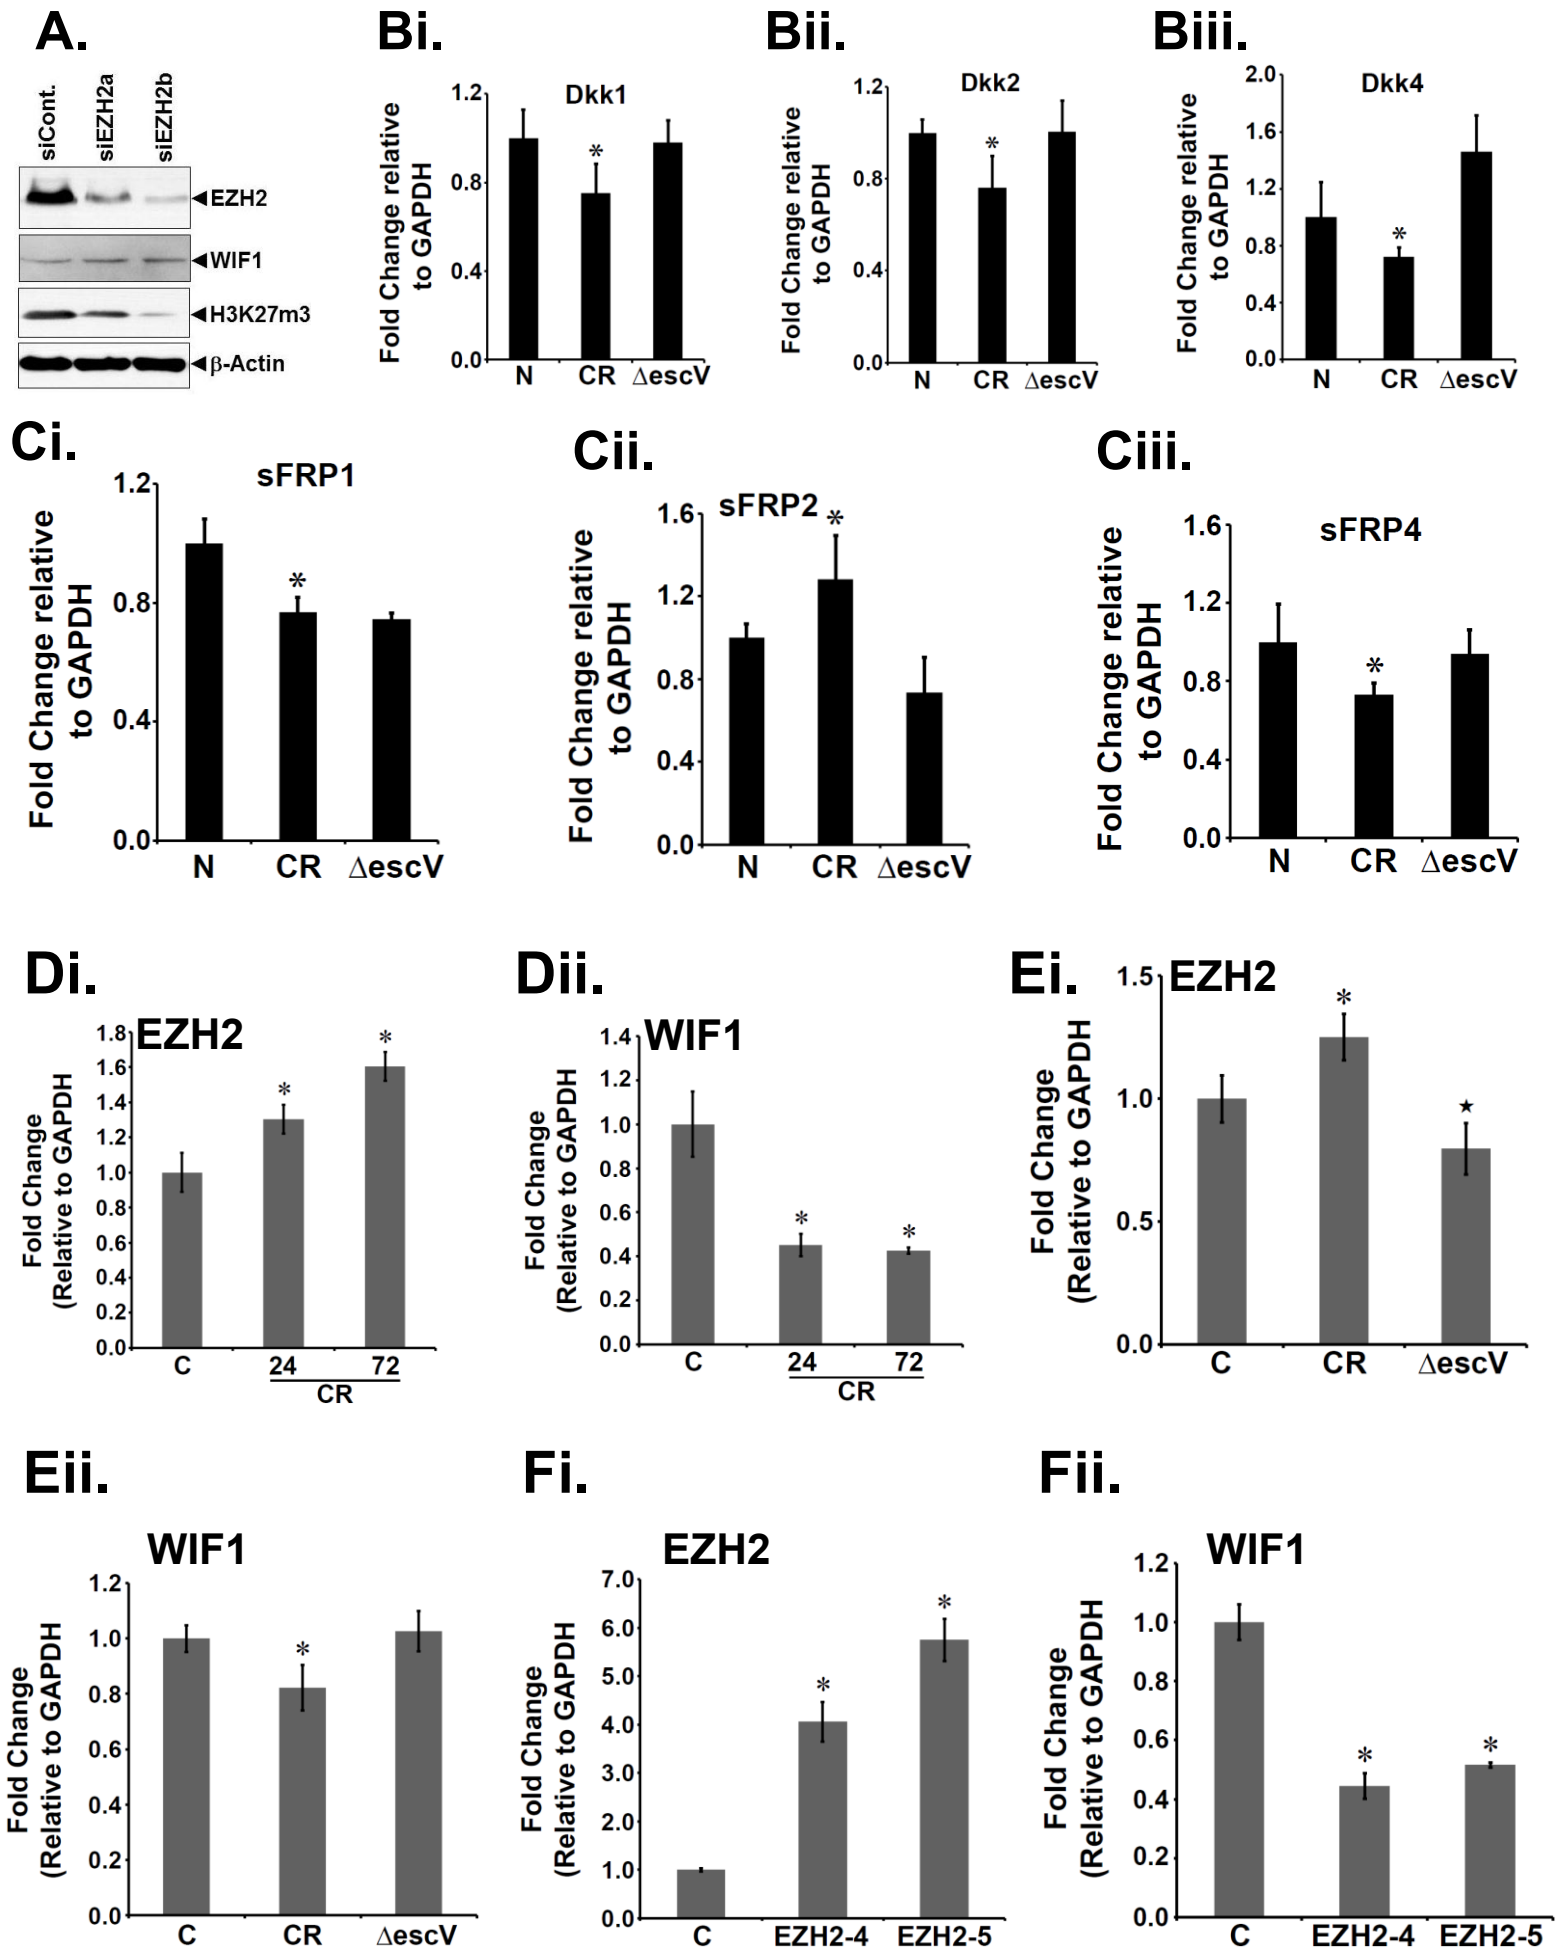

Supplement: NIHMS635673-supplement-3.pdf [file NIHMS635673-supplement-3.pdf]

# Supplementary Figure 4

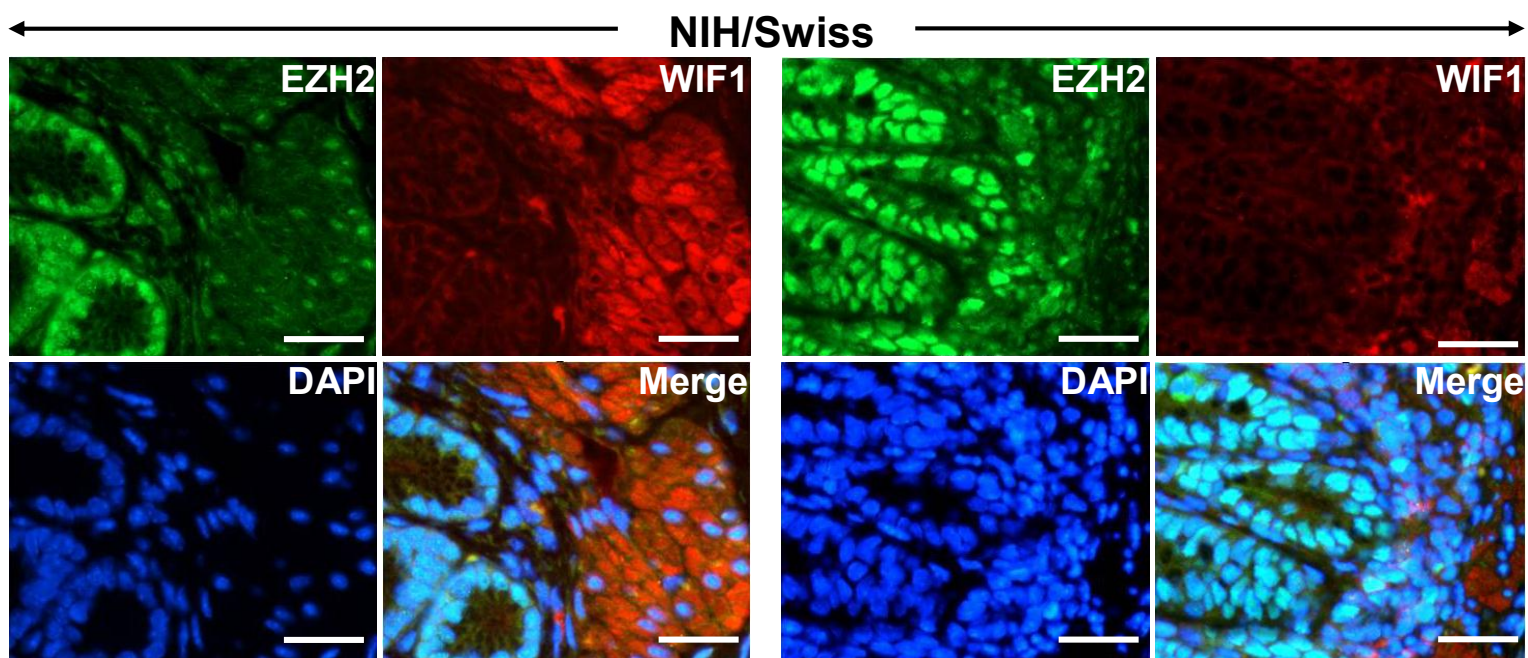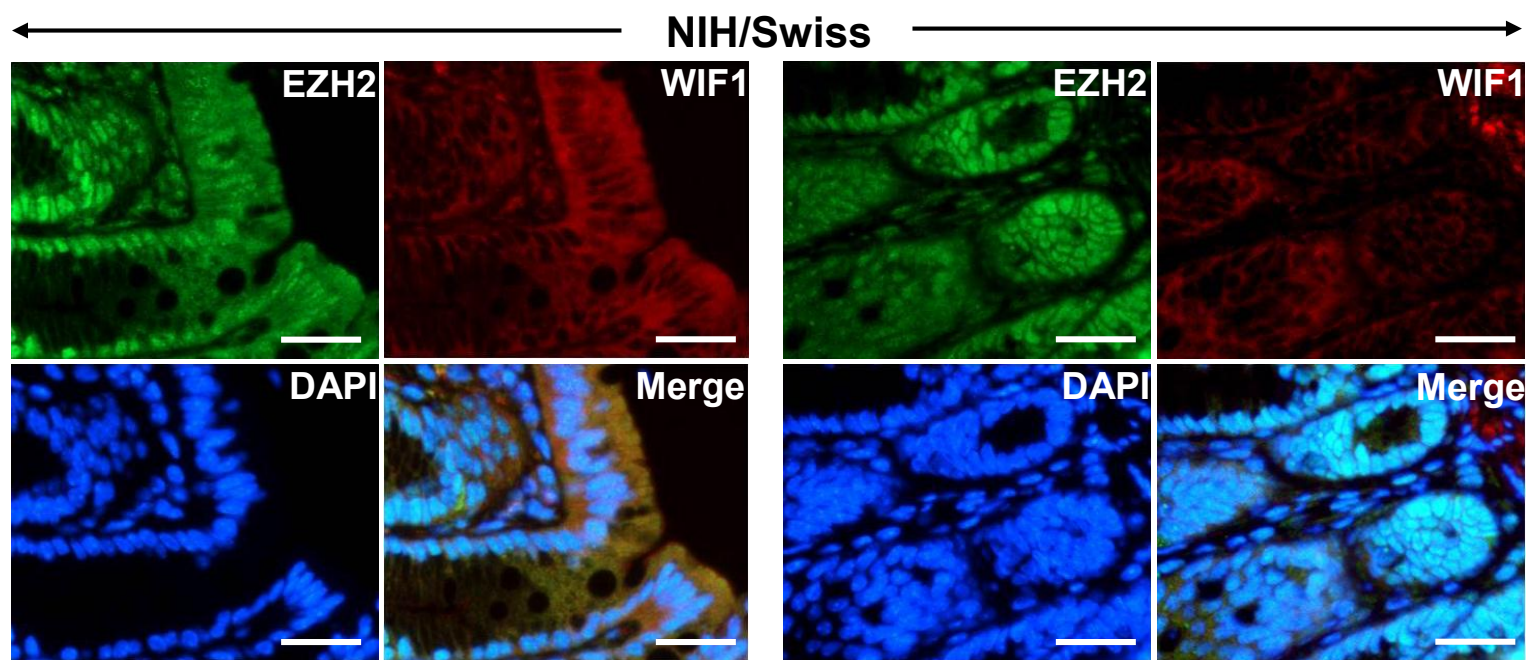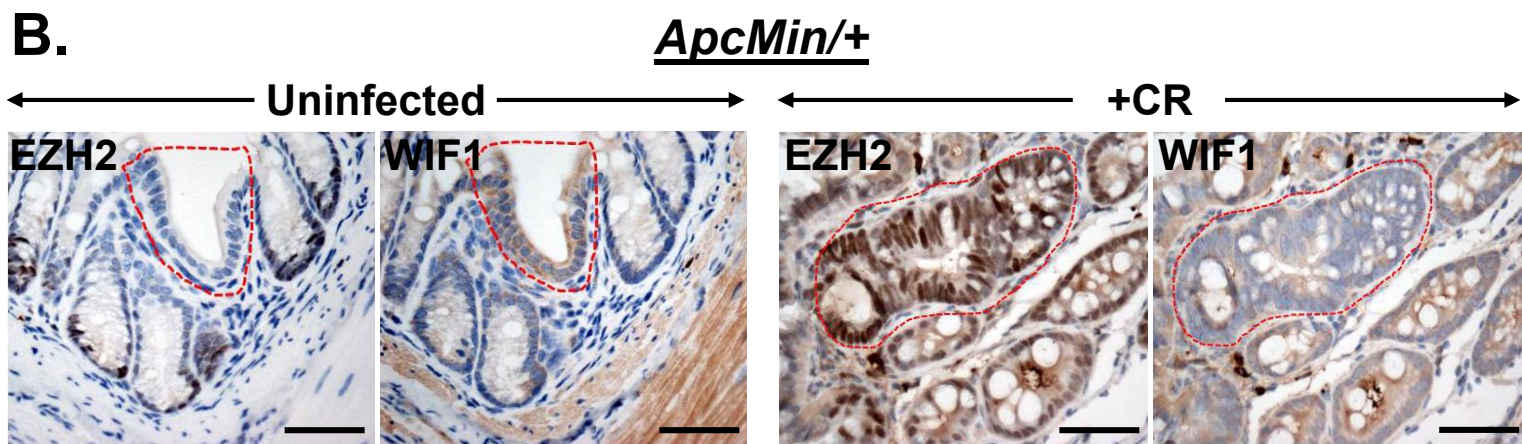

Supplement: NIHMS635673-supplement-4.pdf [file NIHMS635673-supplement-4.pdf]

# Suppl. Figure 6

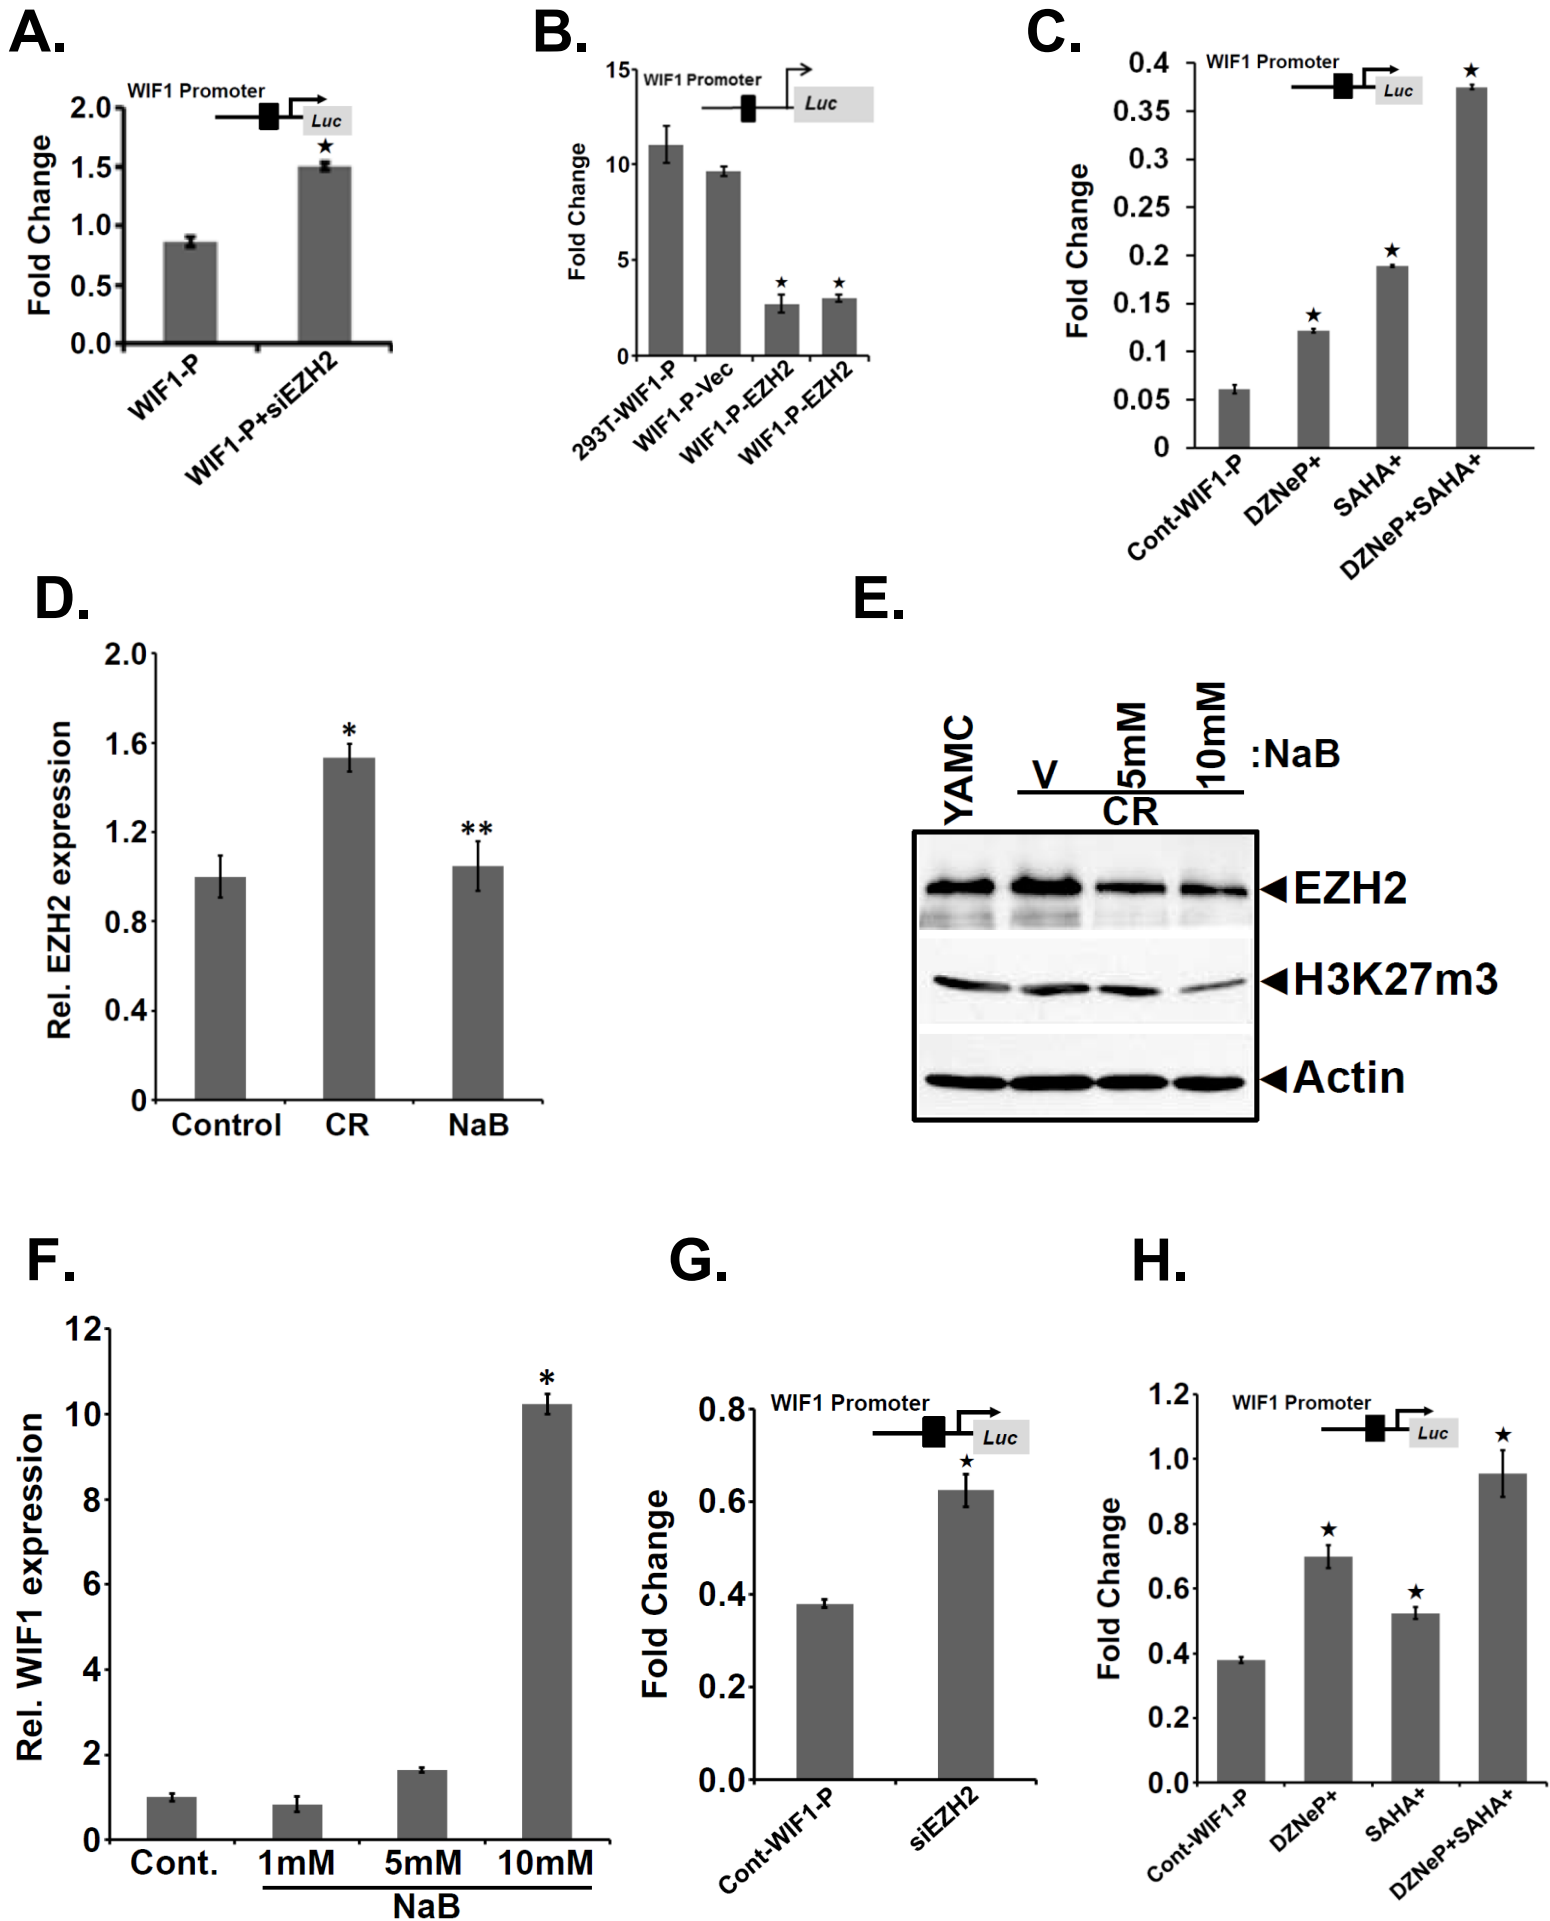

Supplement: NIHMS635673-supplement-6.pdf [file NIHMS635673-supplement-6.pdf]
